# Supplementary material for: Genomic and transcriptional alterations in first-line chemotherapy exert a potentially unfavorable influence on subsequent immunotherapy in NSCLC
Source: PubMed Central journal article supplement (PMC8171101; doi:10.7150/thno.58039), 2021-05-13

**Table S1 Clinical and pathological characteristics of patients**

| Sample_ID | Age | Stage     | Smoking      | Sex    | Subtype | response |
|-----------|-----|-----------|--------------|--------|---------|----------|
| 989150    | 80  | Stage IV  | Never-Smoker | Male   | LADC    | SD       |
| 989875    | 63  | Stage III | Smoker       | Male   | LUSC    | PR       |
| 989687    | 70  | Stage IV  | Smoker       | Male   | LADC    | SD       |
| 992365    | 76  | Stage IV  | Never-Smoker | Male   | LUSC    | SD       |
| 992187    | 60  | Stage II  | Never-Smoker | Male   | LUSC    | PR       |
| 995856    | 62  | Stage III | Never-Smoker | Female | LADC    | SD       |
| 1005670   | 51  | Stage III | Smoker       | Male   | LADC    | SD       |
| 1005028   | 58  | Stage IV  | Smoker       | Male   | LUSC    | PR       |
| 1005034   | 57  | Stage III | Smoker       | Male   | LUSC    | SD       |
| 1005285   | 71  | Stage III | Smoker       | Male   | LADC    | PD       |
| 1010016   | 73  | Stage IV  | Smoker       | Male   | LADC    | SD       |
| 1011921   | 58  | Stage IV  | Smoker       | Male   | LUSC    | PR       |
| 1012220   | 65  | Stage III | Smoker       | Male   | LADC    | SD       |
| 1057871   | 56  | Stage IV  | Never-Smoker | Male   | LUSC    | PD       |
| 1012571   | 22  | Stage IV  | Never-Smoker | Male   | LUSC    | PD       |
| 1019282   | 50  | Stage III | Never-Smoker | Female | LADC    | SD       |
| 1023753   | 72  | Stage III | Never-Smoker | Male   | NSCLC   | SD       |
| 1042236   | 68  | Stage IV  | Never-Smoker | Male   | LUSC    | SD       |
| 1016467   | 57  | Stage IV  | Smoker       | Male   | NSCLC   | PD       |
| 1012146   | 50  | Stage IV  | Never-Smoker | Female | LADC    | SD       |
| 1045648   | 73  | Stage IV  | Smoker       | Male   | LUSC    | PR       |
| 1049458   | 75  | Stage IV  | Smoker       | Male   | LADC    | PD       |
| 1045416   | 66  | Stage III | Smoker       | Male   | LUSC    | SD       |
| 1022152   | 65  | Stage III | Never-Smoker | Male   | LADC    | SD       |
| 1050521   | 40  | Stage III | Never-Smoker | Female | LADC    | SD       |
| 1054678   | 67  | Stage III | Smoker       | Male   | LADC    | SD       |
| 1059201   | 73  | Stage IV  | Smoker       | Male   | LADC    | SD       |
| 1074535   | 67  | Stage IV  | Smoker       | Male   | LADC    | SD       |
| 1052988   | 74  | Stage IV  | Smoker       | Male   | LUSC    | SD       |
| 1076940   | 62  | Stage IV  | Never-Smoker | Female | LADC    | SD       |
| 1076249   | 70  | Stage IV  | Never-Smoker | Female | LADC    | SD       |
| 1082801   | 73  | Stage I   | Smoker       | Male   | LUSC    | SD       |

**Table S2 Differentially mutant genes between LUSC and LADC**

| Gene     | LADC_<br>mut | LADC_<br>WT | LUSC_<br>mut | LUSC_<br>WT | Freq_<br>LADC<br>(%) | Freq_<br>LUSC<br>(%) | <i>P</i> _value |
|----------|--------------|-------------|--------------|-------------|----------------------|----------------------|-----------------|
| PCDH11X  | 0            | 17          | 5            | 8           | 0.00                 | 38.46                | 0.009           |
| MYO16    | 0            | 17          | 4            | 9           | 0.00                 | 30.77                | 0.026           |
| HERC2    | 0            | 17          | 4            | 9           | 0.00                 | 30.77                | 0.026           |
| USH2A    | 2            | 15          | 6            | 7           | 11.76                | 46.15                | 0.049           |
| NFE2L2   | 1            | 16          | 5            | 8           | 5.88                 | 38.46                | 0.061           |
| POU3F3   | 0            | 17          | 3            | 10          | 0.00                 | 23.08                | 0.070           |
| NYAP2    | 0            | 17          | 3            | 10          | 0.00                 | 23.08                | 0.070           |
| ATR      | 0            | 17          | 3            | 10          | 0.00                 | 23.08                | 0.070           |
| FAT1     | 0            | 17          | 3            | 10          | 0.00                 | 23.08                | 0.070           |
| CSMD1    | 0            | 17          | 3            | 10          | 0.00                 | 23.08                | 0.070           |
| SPATA6L  | 0            | 17          | 3            | 10          | 0.00                 | 23.08                | 0.070           |
| LRP2     | 0            | 17          | 3            | 10          | 0.00                 | 23.08                | 0.070           |
| NDST4    | 0            | 17          | 3            | 10          | 0.00                 | 23.08                | 0.070           |
| ADGRV1   | 0            | 17          | 3            | 10          | 0.00                 | 23.08                | 0.070           |
| ANKRD30A | 0            | 17          | 3            | 10          | 0.00                 | 23.08                | 0.070           |
| OTOF     | 0            | 17          | 3            | 10          | 0.00                 | 23.08                | 0.070           |
| ROS1     | 0            | 17          | 3            | 10          | 0.00                 | 23.08                | 0.070           |
| ADGRL1   | 0            | 17          | 3            | 10          | 0.00                 | 23.08                | 0.070           |
| DLGAP2   | 0            | 17          | 3            | 10          | 0.00                 | 23.08                | 0.070           |
| DYNC2H1  | 0            | 17          | 3            | 10          | 0.00                 | 23.08                | 0.070           |

**Table S3 Differentially mutant genes between PR/SD and PD patients**

| Gene    | PR/SD_<br>mut | PR/SD_<br>WT | PD_<br>mut | PD_<br>WT | freq_PR/SD<br>(%) | freq_PD<br>(%) | <i>P</i> _value |
|---------|---------------|--------------|------------|-----------|-------------------|----------------|-----------------|
| FZD10   | 0             | 27           | 3          | 2         | 0.00              | 60.00          | 0.002           |
| RBM25   | 0             | 27           | 3          | 2         | 0.00              | 60.00          | 0.002           |
| RIMS2   | 1             | 26           | 3          | 2         | 3.70              | 60.00          | 0.008           |
| OTOG    | 2             | 25           | 3          | 2         | 7.41              | 60.00          | 0.018           |
| ZNF518B | 0             | 27           | 2          | 3         | 0.00              | 40.00          | 0.020           |
| UGGT2   | 0             | 27           | 2          | 3         | 0.00              | 40.00          | 0.020           |
| CBX8    | 0             | 27           | 2          | 3         | 0.00              | 40.00          | 0.020           |
| KEAP1   | 0             | 27           | 2          | 3         | 0.00              | 40.00          | 0.020           |
| SOX12   | 0             | 27           | 2          | 3         | 0.00              | 40.00          | 0.020           |
| FOXB2   | 0             | 27           | 2          | 3         | 0.00              | 40.00          | 0.020           |
| NEB     | 0             | 27           | 2          | 3         | 0.00              | 40.00          | 0.020           |
| SLC6A1  | 0             | 27           | 2          | 3         | 0.00              | 40.00          | 0.020           |
| CCDC96  | 0             | 27           | 2          | 3         | 0.00              | 40.00          | 0.020           |
| TIFA    | 0             | 27           | 2          | 3         | 0.00              | 40.00          | 0.020           |
| ADCY2   | 0             | 27           | 2          | 3         | 0.00              | 40.00          | 0.020           |
| PDZRN4  | 0             | 27           | 2          | 3         | 0.00              | 40.00          | 0.020           |
| CAPS2   | 0             | 27           | 2          | 3         | 0.00              | 40.00          | 0.020           |
| SHISA2  | 0             | 27           | 2          | 3         | 0.00              | 40.00          | 0.020           |
| NRDE2   | 0             | 27           | 2          | 3         | 0.00              | 40.00          | 0.020           |
| RTL1    | 0             | 27           | 2          | 3         | 0.00              | 40.00          | 0.020           |
| GTF3C1  | 0             | 27           | 2          | 3         | 0.00              | 40.00          | 0.020           |
| BCAR1   | 0             | 27           | 2          | 3         | 0.00              | 40.00          | 0.020           |
| NFATC1  | 0             | 27           | 2          | 3         | 0.00              | 40.00          | 0.020           |
| LANCL3  | 0             | 27           | 2          | 3         | 0.00              | 40.00          | 0.020           |
| ATP7A   | 0             | 27           | 2          | 3         | 0.00              | 40.00          | 0.020           |
| NPR1    | 0             | 27           | 2          | 3         | 0.00              | 40.00          | 0.020           |
| TDP2    | 0             | 27           | 2          | 3         | 0.00              | 40.00          | 0.020           |
| CNGA4   | 0             | 27           | 2          | 3         | 0.00              | 40.00          | 0.020           |
| EPS8    | 0             | 27           | 2          | 3         | 0.00              | 40.00          | 0.020           |
| SSH1    | 0             | 27           | 2          | 3         | 0.00              | 40.00          | 0.020           |
| TCF4    | 0             | 27           | 2          | 3         | 0.00              | 40.00          | 0.020           |
| KRAS    | 3             | 24           | 3          | 2         | 11.11             | 60.00          | 0.034           |

Figure S1. Illustration of demographic information of all patients involved in this study. Information on sex, age, smoking history, cancer subtype, cancer stage, and therapeutic response of all patients are shown by bars with distinct colors. Sampling conditions in WES (DNA) is also indicated. LADC = lung adenocarcinoma; LUSC = lung squamous cell carcinoma.

Figure S2. Flowchart showing the procedure of sampling, targeted NGS, and data analysis in this study. Lung cancer tissue samples were collected before and after chemotherapy and were examined by WES and transcriptome sequencing. Mutational change, TMB, antigen presentation, and their correlation with therapeutic response were analyzed.

Figure S3. The status of unique mutations and common mutations before and after chemotherapy. The ratio of unique and common mutations is shown for each patient for LADC and LUSC in the left panel, and the statistics for these is shown in the right panels. A significantly lower percentage was found in post-therapeutic unique mutations in LUSC while this was not observed with LADC.

Figure S4. Pathway enrichment analysis on mutations before and after chemotherapy. (A) GO and KEGG enrichment analysis on mutations before chemotherapy; (B) GO and KEGG enrichment analysis on mutations after chemotherapy

Figure S5. The correlation between the trend of TMB change and patients survival of never-smoking patients.

Figure S6. The distribution of CNVs across each chromosome of each patients. (A) the CNVs before chemotherapy; (B) the CNVs after chemotherapy.

Figure S7. The distribution of CNVs at arm and focal level. (A) the distribution of CNVs at the arm level (red represents the amplification, blue represents the deletion; chromosome having significant amplification was marked in red, having significant deletion was marked in blue and having both significant amplification and deletion was marked in green); (B) the distribution of pre-therapeutic CNVs at the focal level (red represents the amplification, blue represents the deletion); (C) the distribution of post-therapeutic CNVs at the focal level (red represents the amplification, blue represents the deletion).

Figure S1

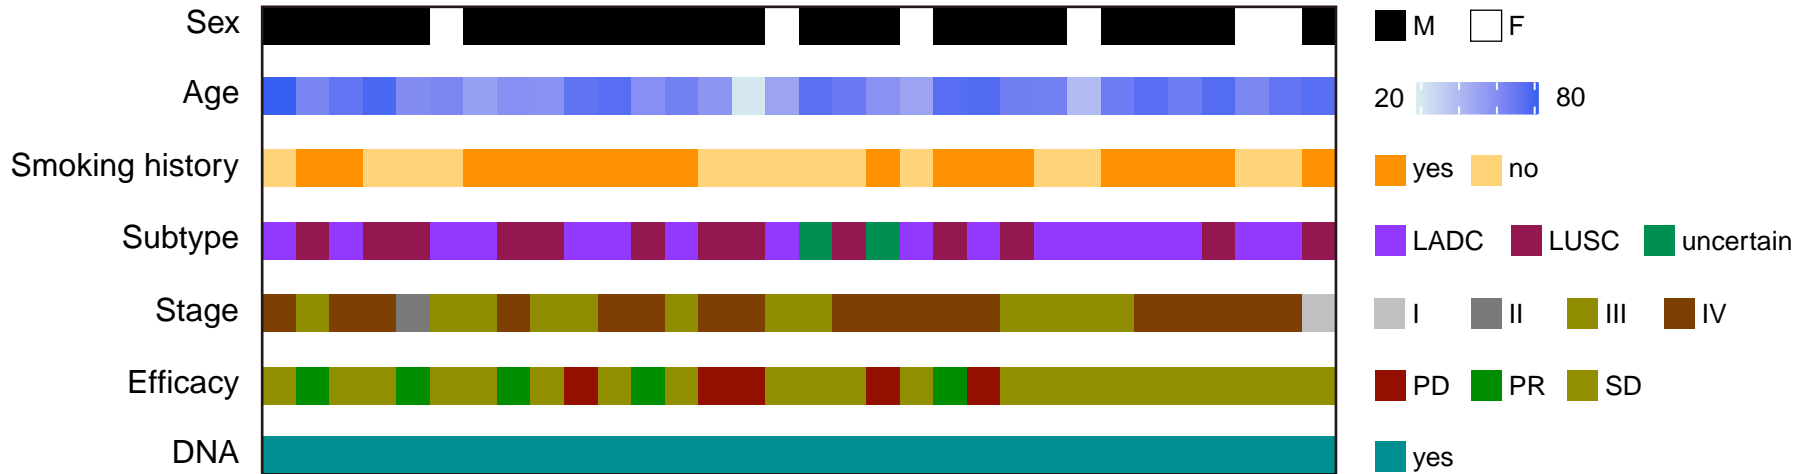

Figure S2

## Sampling strategy

## Experimental methods

## Data analysis

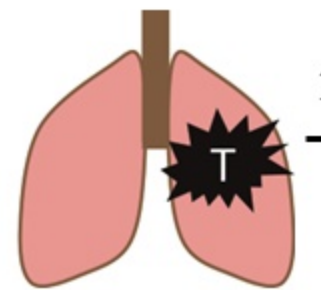

**Before  
Chemotherapy**

**1<sup>st</sup> sample**

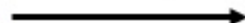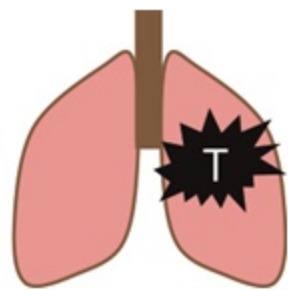

**After  
Chemotherapy**

**2<sup>nd</sup> sample**

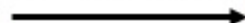

**Whole-exome  
sequencing (WES)**

**Transcriptome  
(mRNA) sequencing**

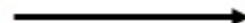

**Mutational  
change**

**TMB**

**Antigen  
presentation**

**Correlation  
with response**

Figure S3

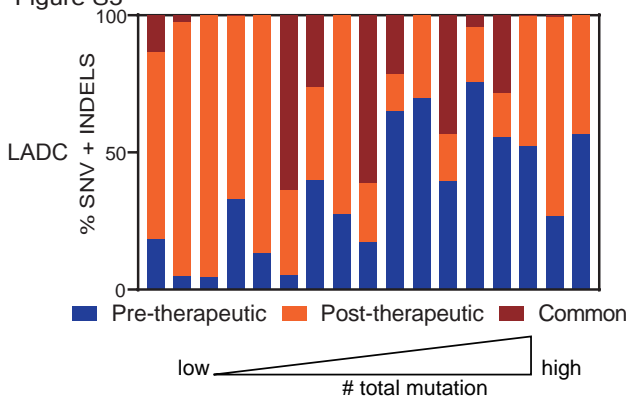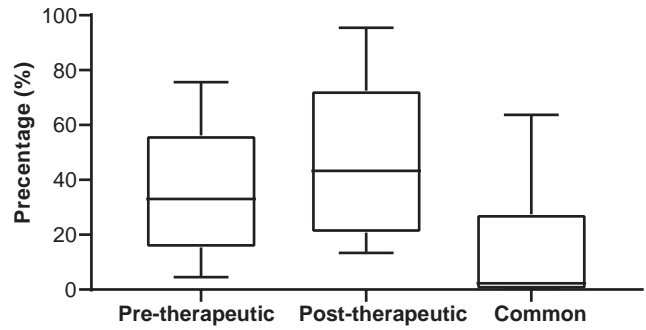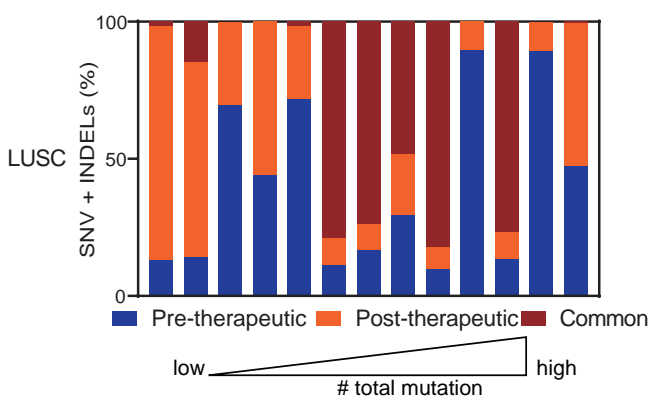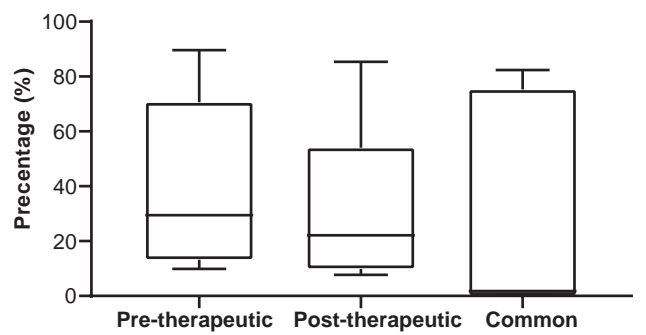

**A** Figure S4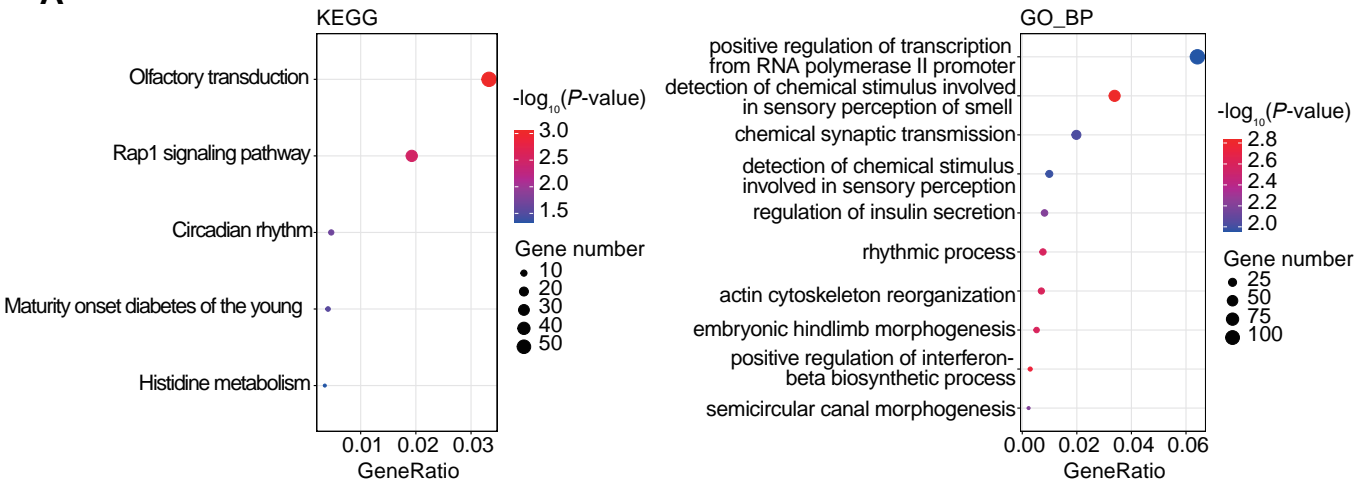**B**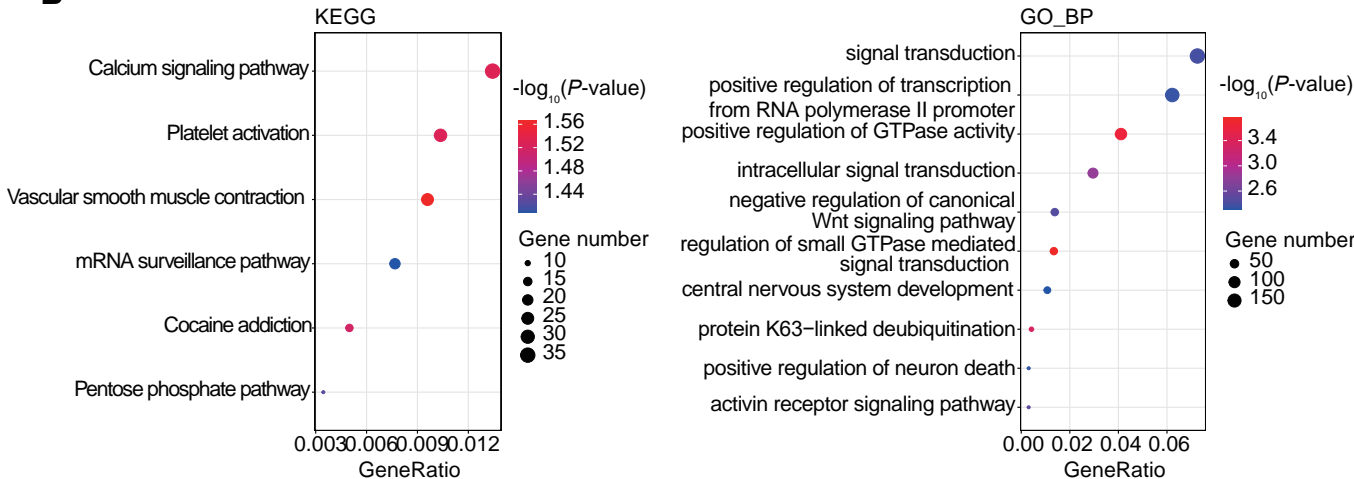



**A** Figure S5

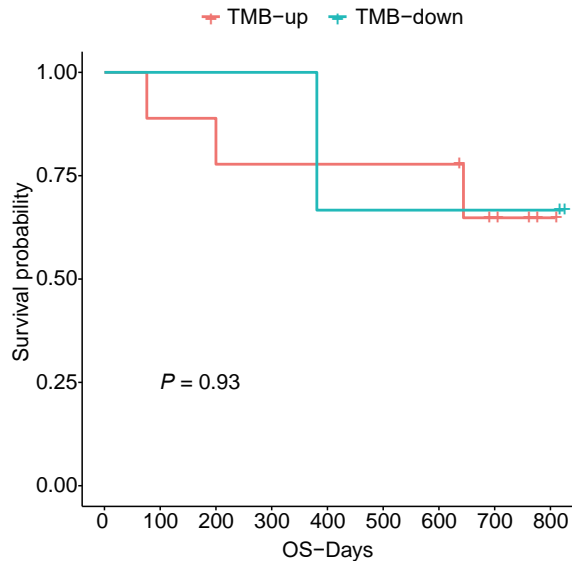

**B**

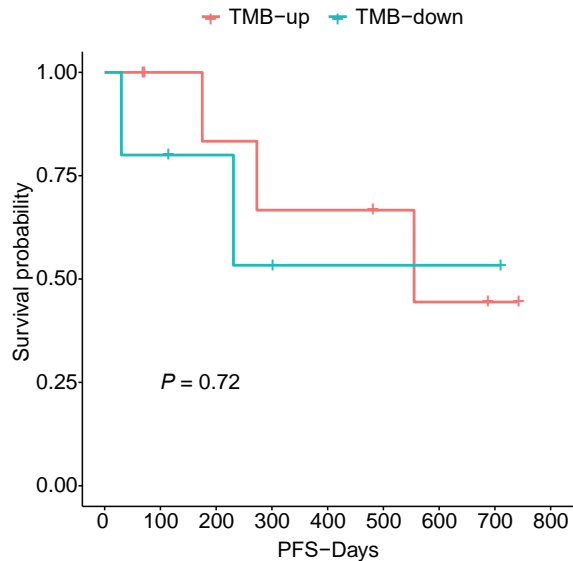

**A**

Figure S6

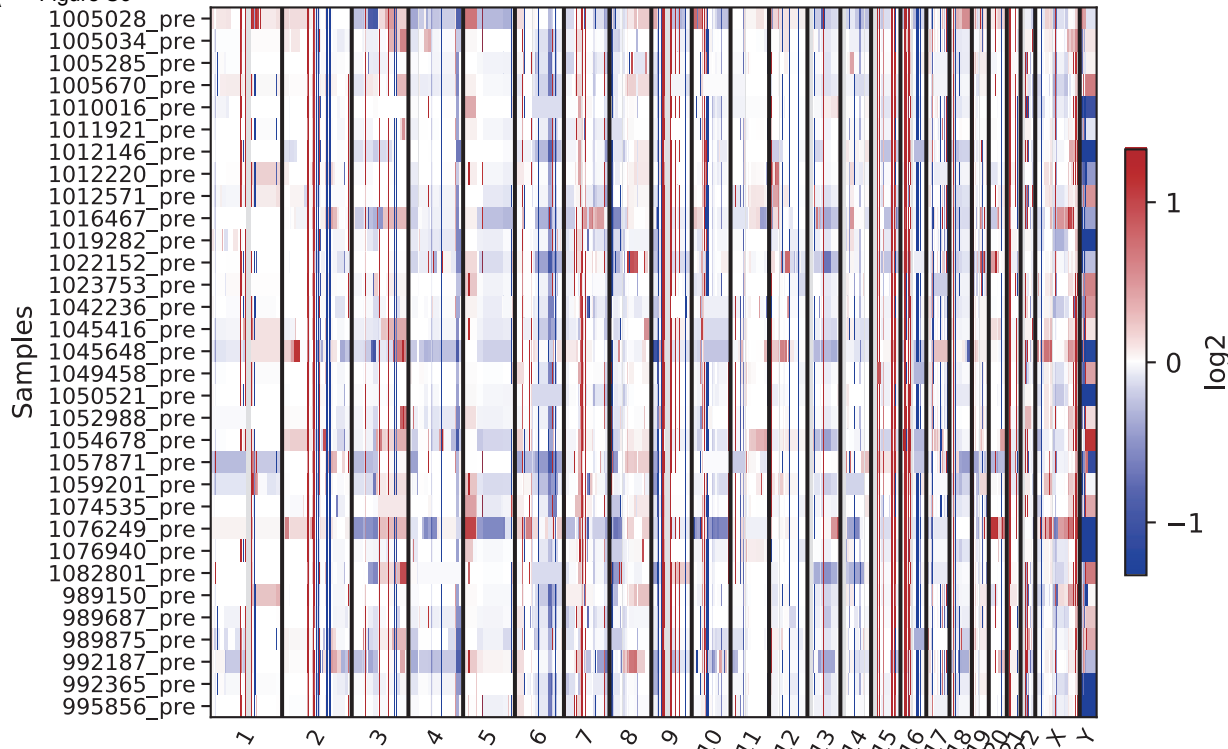**B**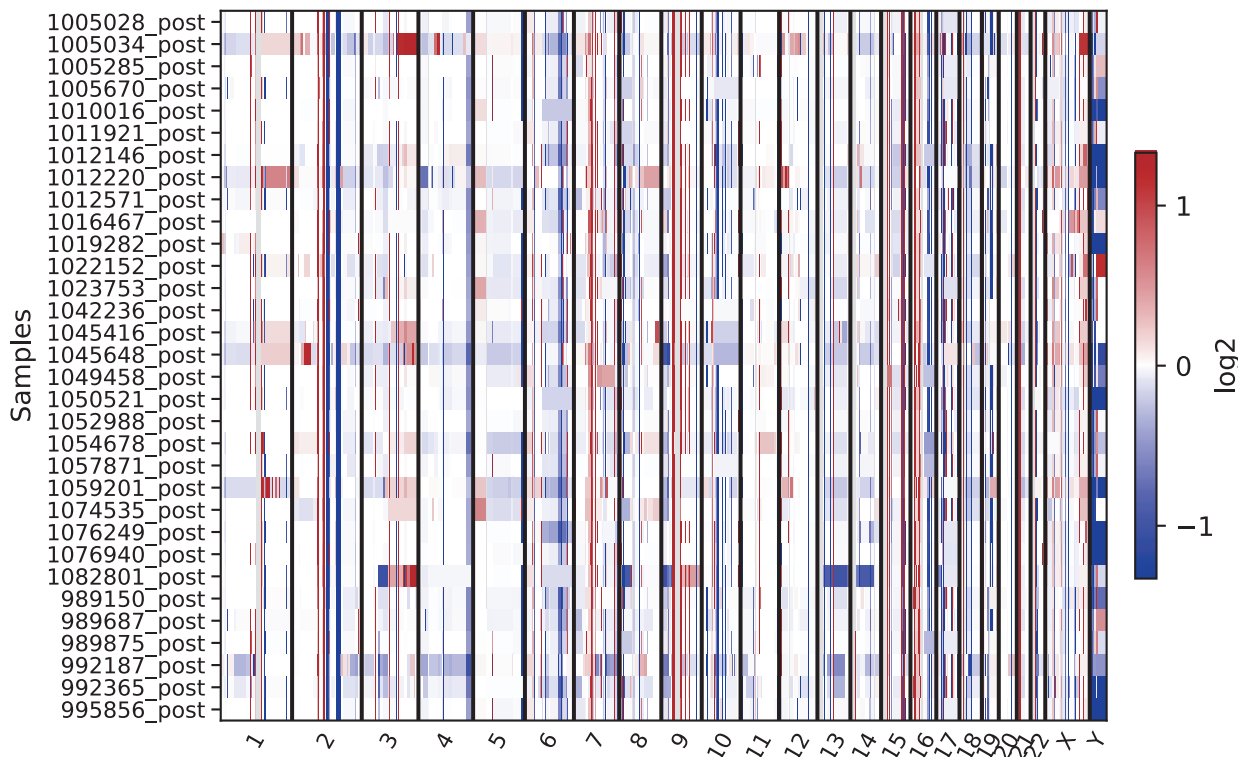

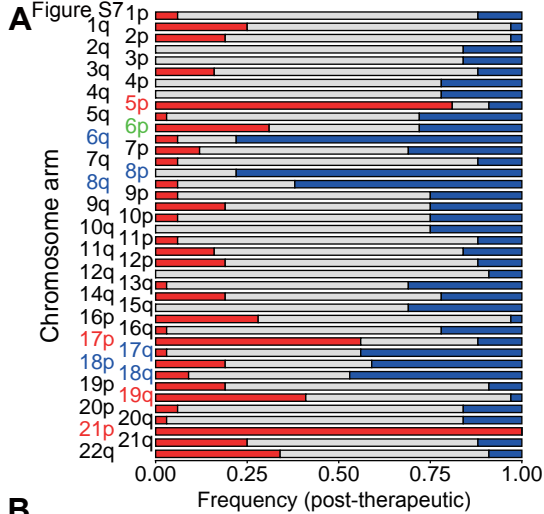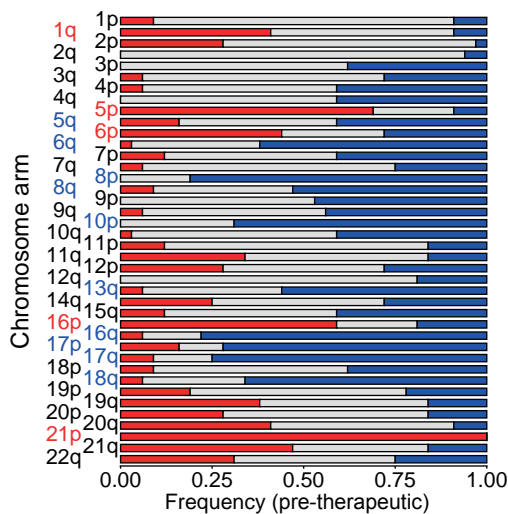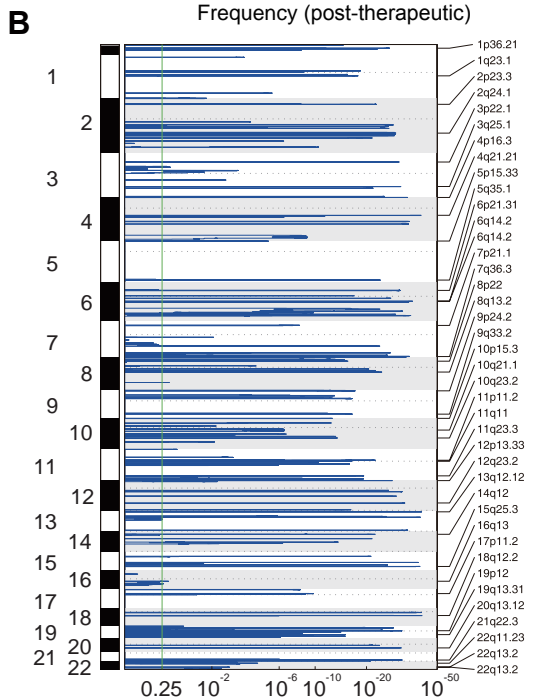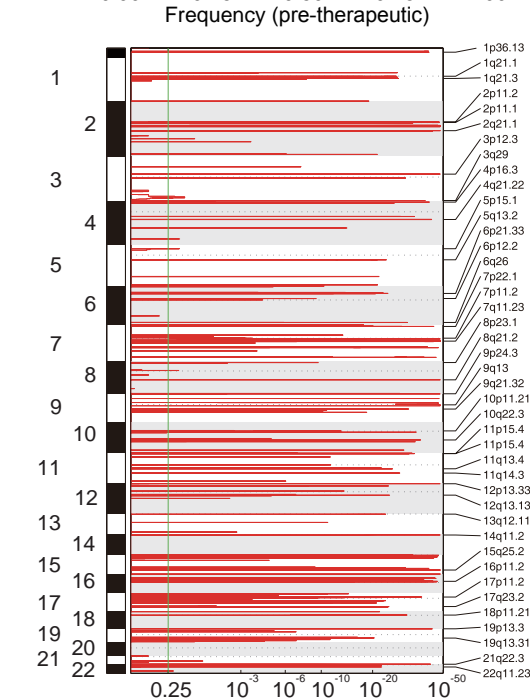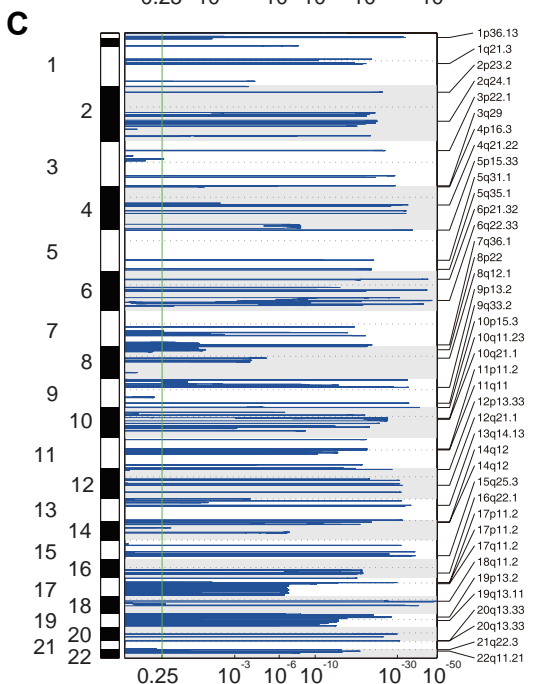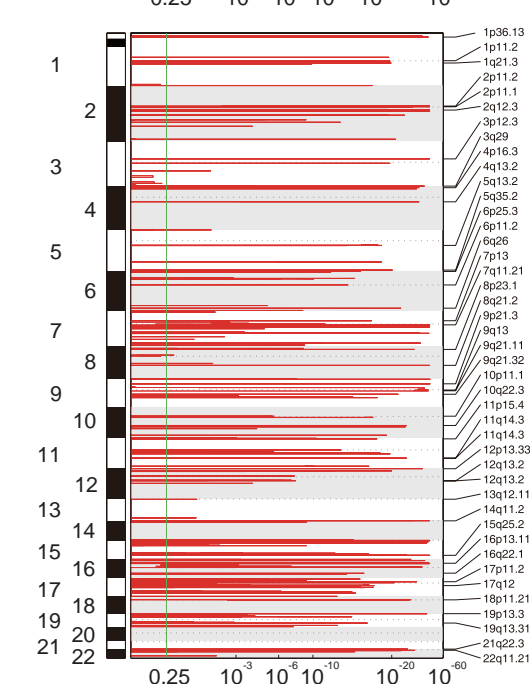

Supplement: thnov11p7092s1.pdf [file thnov11p7092s1.pdf]
